# Supplementary material for: Polyhydroxyurethane covalent adaptable networks: looking for suitable catalysts
Source: Royal Society of Chemistry journal article supplement (doi:10.1039/d3py00579h), 2023-01-01
Supplement: d3py00579h1.pdf [file d3py00579h1.pdf]

# Electronic Supplementary Information

## Polyhydroxyurethane Covalent Adaptable Networks: Looking for Suitable Catalysts

Camille Bakkali-Hassani\*,<sup>1</sup> Dimitri Berne,<sup>1</sup> Pauline Bron,<sup>1,2</sup> Lourdes Irusta,<sup>2</sup> Haritz Sardon,<sup>2</sup> Vincent Ladmiral <sup>1</sup> and Sylvain Caillol <sup>1\*</sup>

Corresponding author Email: [camille.bakkali-hassani@umontpellier.fr](mailto:camille.bakkali-hassani@umontpellier.fr),  
[sylvain.caillol@enscm.fr](mailto:sylvain.caillol@enscm.fr)

<sup>1</sup> ICGM, Univ Montpellier, CNRS, ENSCM, Montpellier, France

<sup>2</sup> POLYMAT, Department of Polymers and Advanced Materials: Physics, Chemistry and Technology, University of the Basque Country UPV/EHU, Donostia–San Sebastian, Spain

## Supplementary analysis

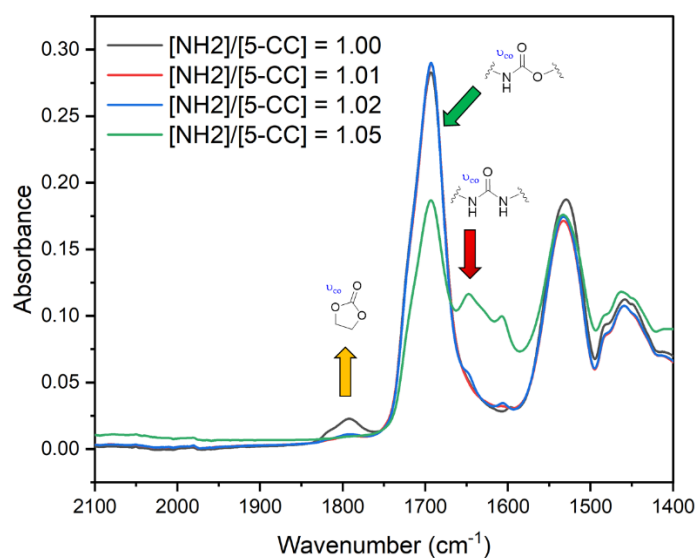

**Figure S1.** ATR-IR spectra (zoom on 2100-1400  $\text{cm}^{-1}$ ) of non-catalysed formulation with different excess of primary amine (0, 1, 2 and 5 mol%  $\text{NH}_2$  excess as compare to 5-CC functions).

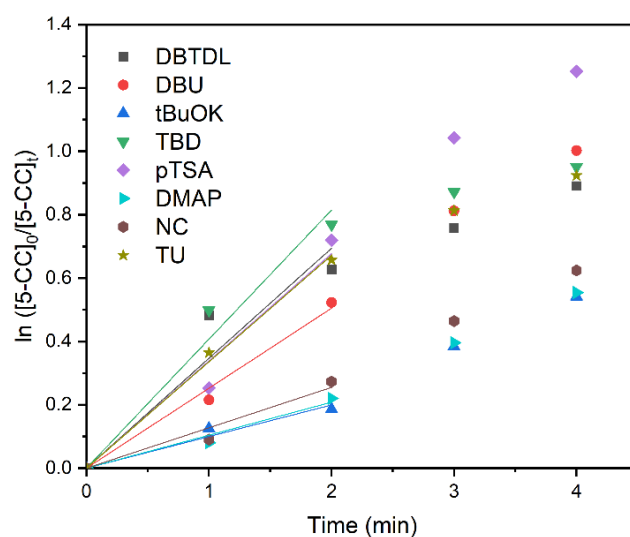

| Equation  | $y = a + b \cdot x$   |                       |                       |                       |                       |                      |                       |                       |
|-----------|-----------------------|-----------------------|-----------------------|-----------------------|-----------------------|----------------------|-----------------------|-----------------------|
| Plot      | DBTDL                 | DBU                   | <i>t</i> -BuOK        | TBD                   | p-TSA                 | DMAP                 | NC                    | TU                    |
| Intercept | $0 \pm --$            | $0 \pm --$           | $0 \pm --$            | $0 \pm --$            |
| Slope     | $0.34693 \pm 0.04775$ | $0.25233 \pm 0.01293$ | $0.09977 \pm 0.00911$ | $0.40724 \pm 0.03239$ | $0.33844 \pm 0.03014$ | $0.1041 \pm 0.00849$ | $0.12748 \pm 0.01318$ | $0.33574 \pm 0.01019$ |

|       |         |         |         |         |         |        |         |         |
|-------|---------|---------|---------|---------|---------|--------|---------|---------|
| $R^2$ | 0.94525 | 0.99216 | 0.97542 | 0.98126 | 0.97658 | 0.9803 | 0.96862 | 0.99724 |
|-------|---------|---------|---------|---------|---------|--------|---------|---------|

**Figure S2.**  $\ln([5\text{-CC}]_0/[5\text{CC}]_t)$  vs. time plot used to calculate ( $k_{\text{cat}}/k_{\text{NC}}$ ) presented in Table 1 (bulk, 80°C for 24h,  $[\text{NH}_2]_0/[\text{5-CC}]_0 = 1.01$ ). The linear fit was performed between 0 and 2 min of polymerisation as a clear deviation is observed when conversion reach 50%.

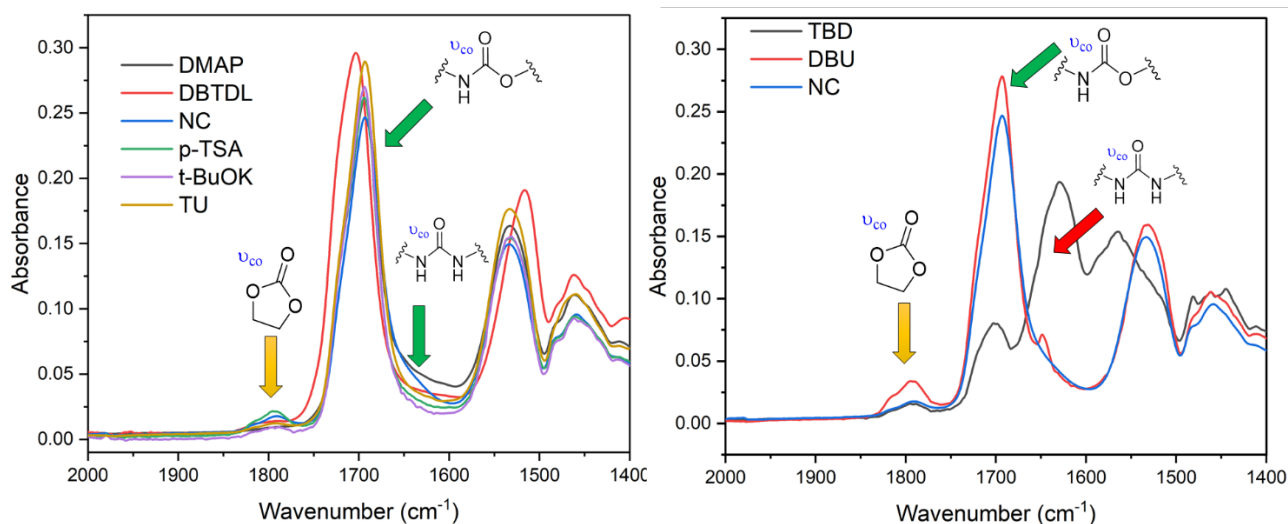

**Figure S3.** ATR-IR spectra of PHU networks after 24h at 80°C.

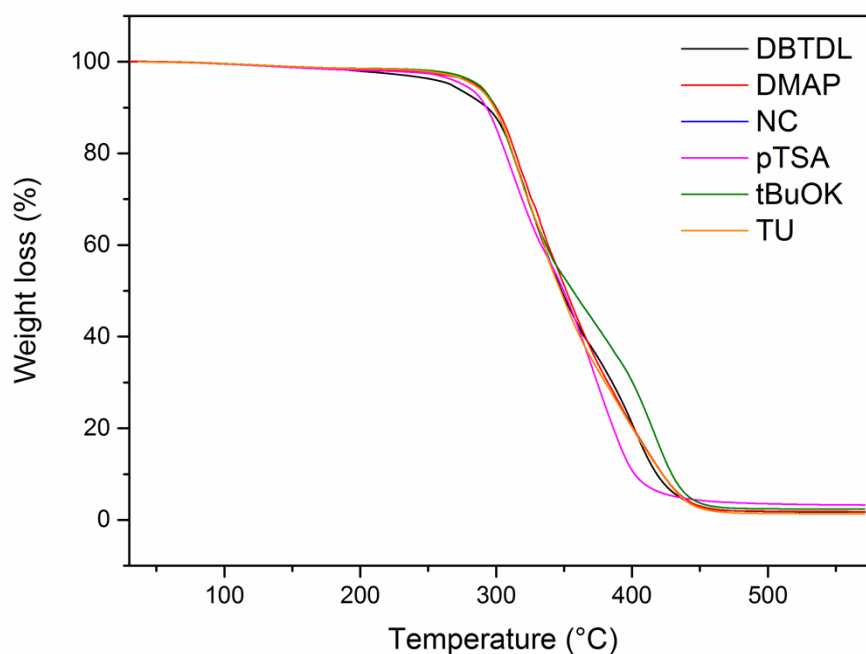

**Figure S4.** TGA analysis of PHU network after 24 h at 80 °C.

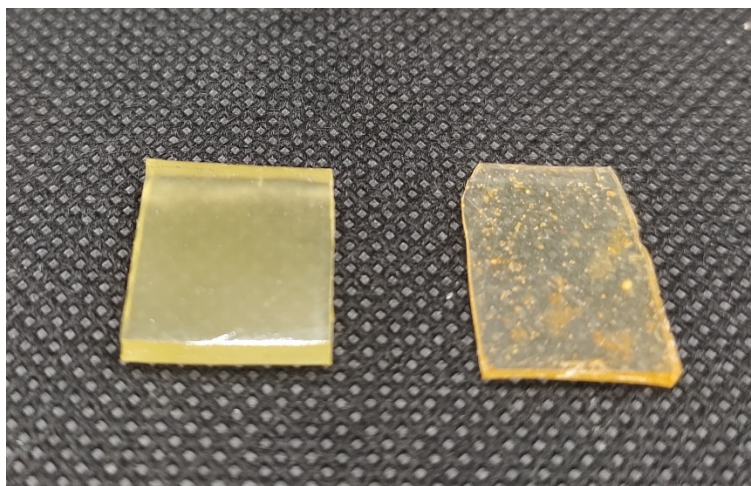

**Figure S5.** Picture PHU-NC (non-catalyzed formulation, on the left) and PHU containing 5 mol% of *t*-BuOK after curing at 80°C for 24h.

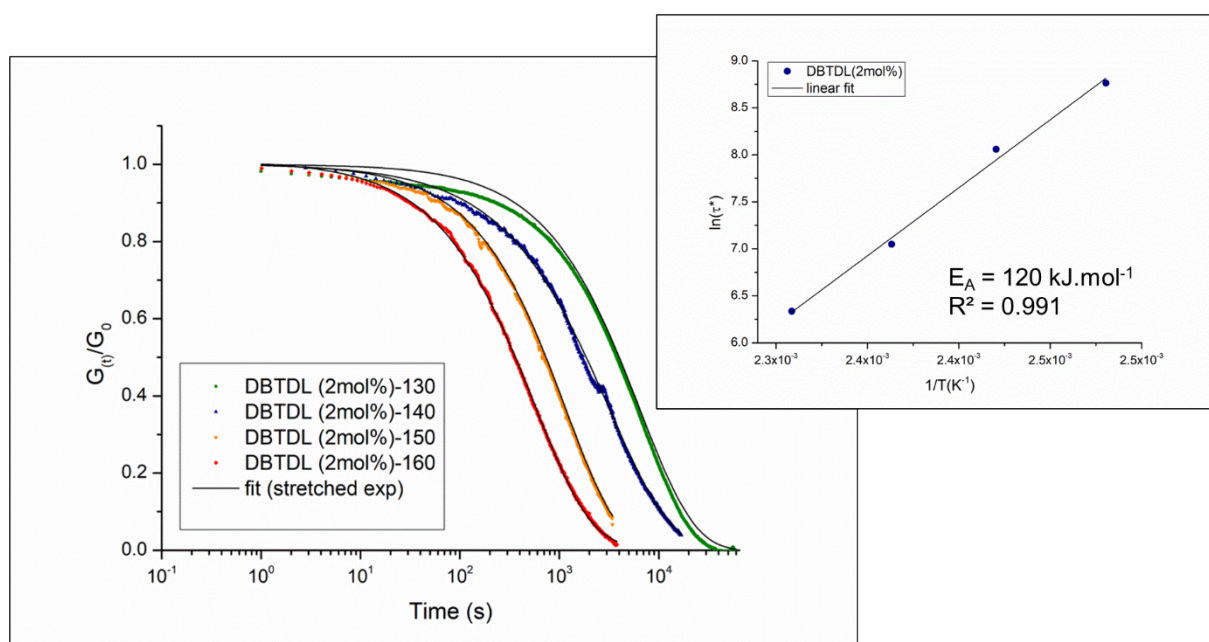

**Figure S6.** Normalised stress relaxation curves and Arrhenius plot for DBTDL-PHU system (SR curves were fitted using stretched exponential fitting function to determine the characteristic relaxation time).

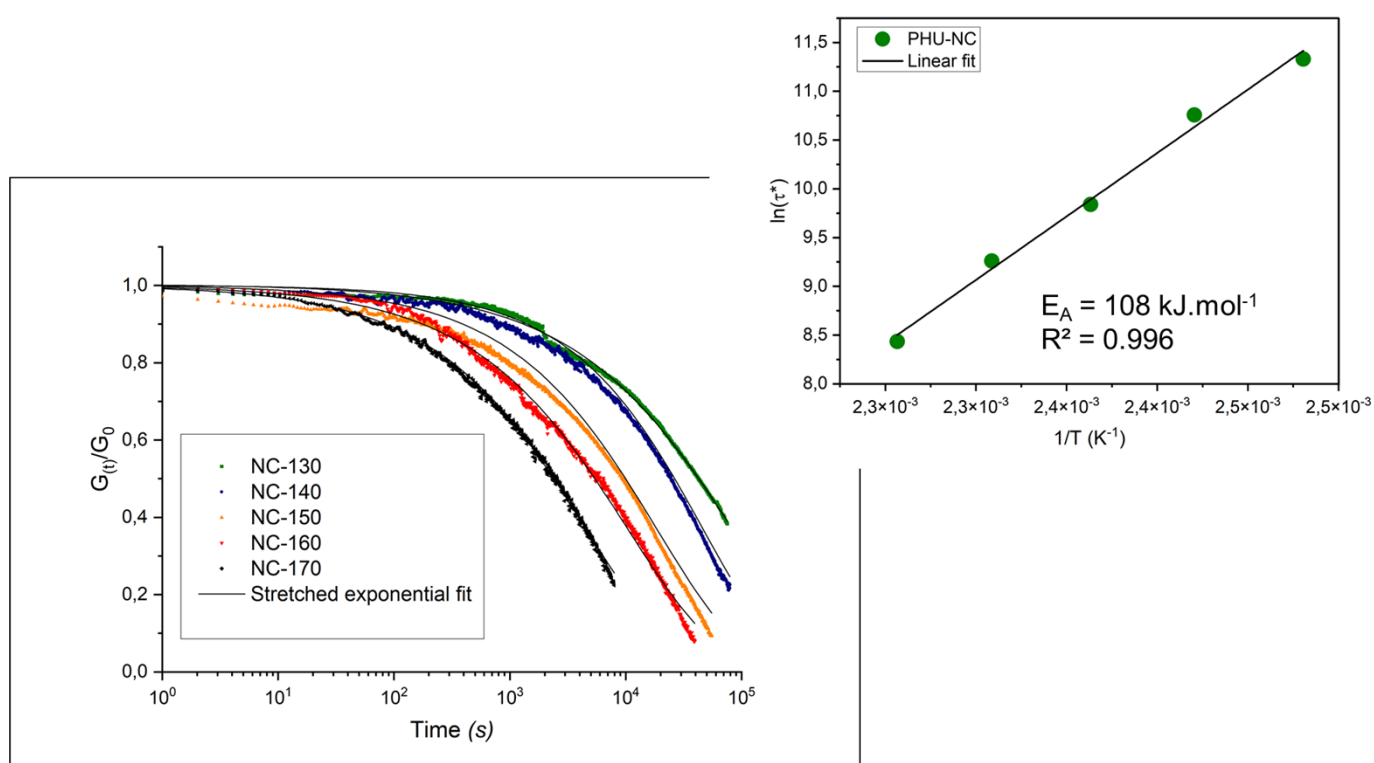

**Figure S7.** Normalised stress relaxation curves and Arrhenius plot for NC-PHU system (SR curves were fitted using stretched exponential fitting function to determine the characteristic relaxation time).

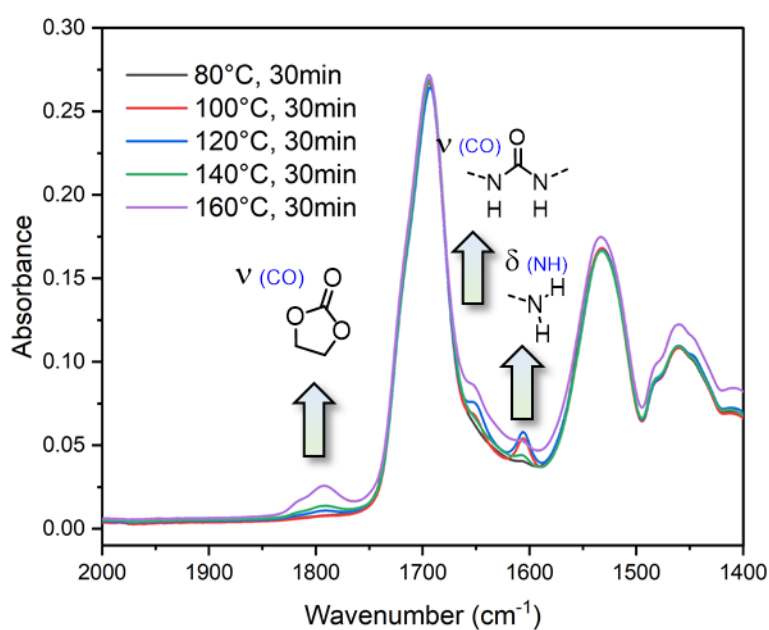

**Figure S8.** ATR-IR spectra of PHU-DMAP networks after sweep experiments after 30 min at 80 °C, 100 °C, 120 °C, 140 °C and 160 °C.

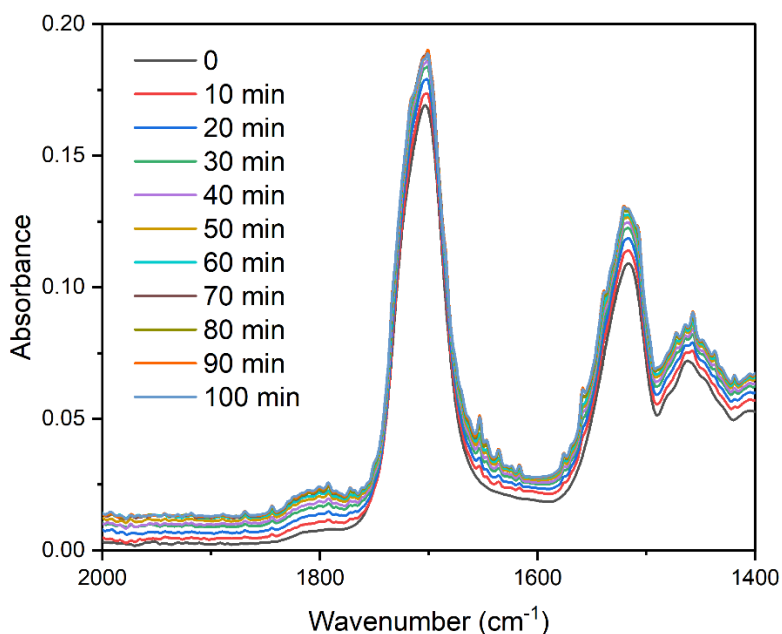

**Figure S9.** ATR-IR spectra (in absorbance) at 140°C of PHU-DBTDL material as a function of time. The spectra showed no significant evolution of ATR characteristic bands.

**Table S1.** Swelling indices and gel contents of PHU networks carried out in 1,4 butanediol at 140°C for one week.

| Catalyst                            | Swelling index (%) | Gel content (%) |
|-------------------------------------|--------------------|-----------------|
| No catalyst                         | 340 ± 10           | 82 ± 1          |
| <i>t</i> -BuOK                      | 200 ± 20           | 87 ± 2.5        |
| Thiourea                            | 300 ± 5            | 82 ± 3          |
| DBTDL                               | Soluble            | Soluble         |
| DBTDL (after 3 reprocessing cycles) | Soluble            | Soluble         |
| DMAP                                | 260 ± 20           | 83 ± 2          |
| <i>p</i> -TSA                       | 310 ± 50           | 72 ± 8          |

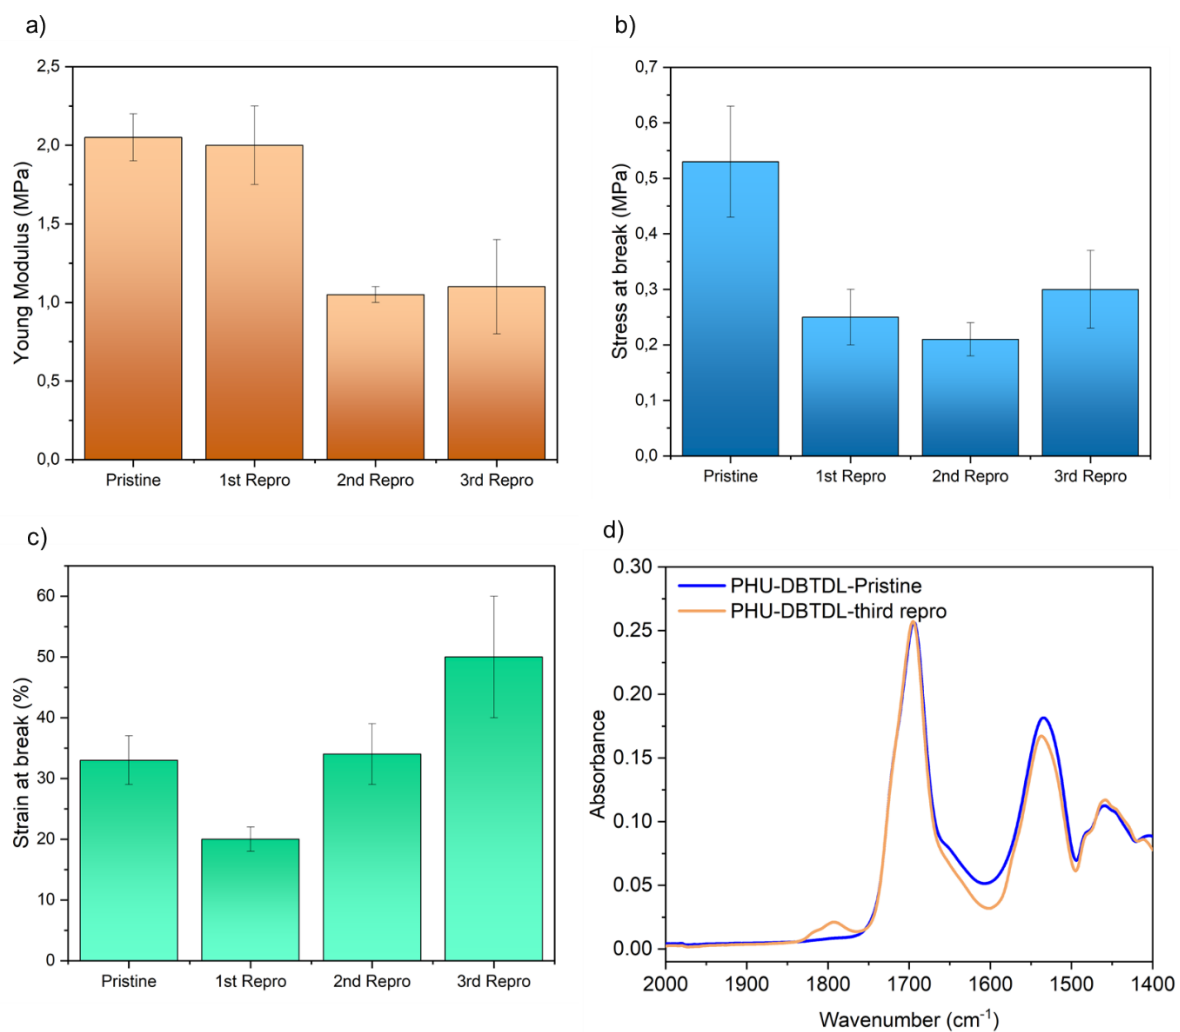

**Figure S10.** Reprocessing ability of PHU-DBTDL network measured by tensile test after each reprocessing cycle (8h, 120°C, 3 tons) a) young modulus, b) stress at break and c) strain at break. d) ATR-IR spectra before (blue) and after (orange) three reprocessing cycles.

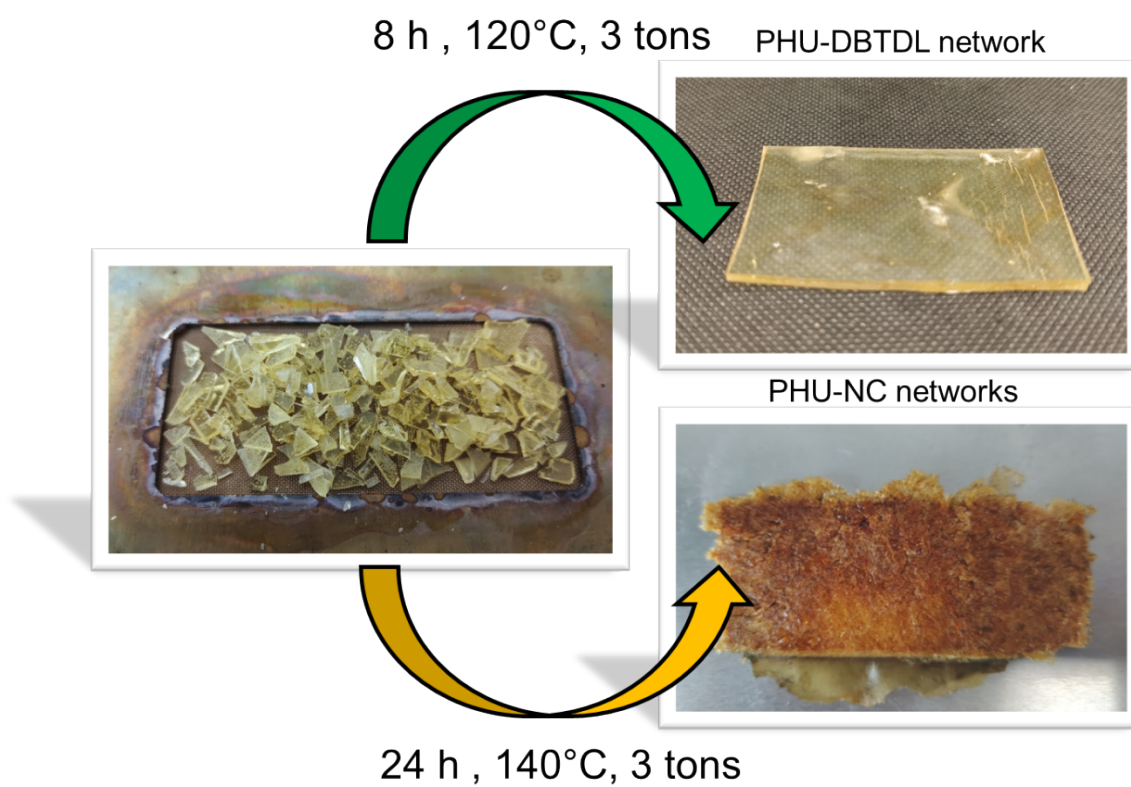

**Figure S11.** Picture of reprocessed samples (top) PHU-DBTDL at 120°C, 8h, hot press, 3 tons and (bottom) PHU-NC at 140°C, 2h, hot press, 3 tons.



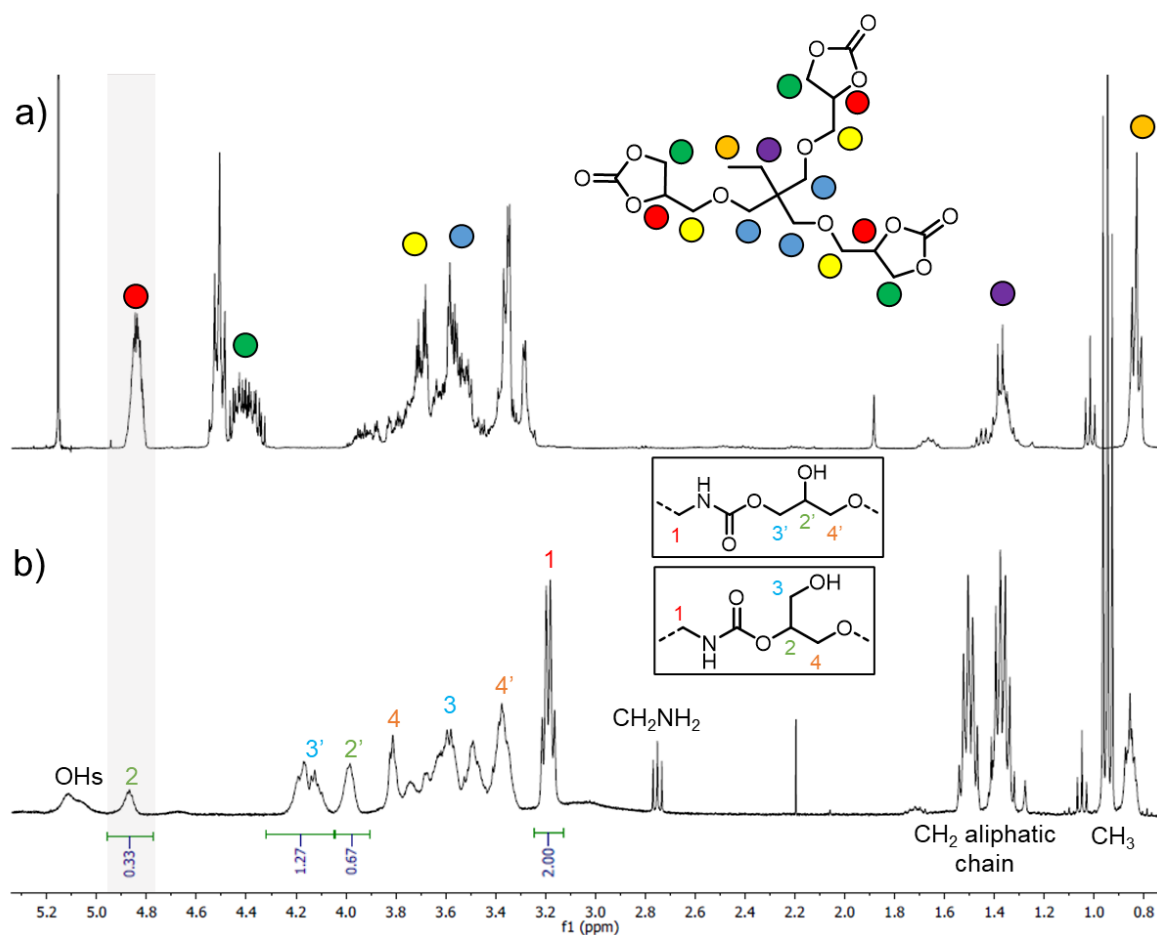

**Figure S12.** a)  $^1\text{H}$  NMR spectrum (in  $\text{CDCl}_3$ ) of trimethylolpropane tricarcarbonate and b)  $^1\text{H}$  NMR spectrum (in  $\text{CDCl}_3$ ) of the model reaction of trimethylolpropane tricarcarbonate with 3 equivalents of *n*-butyl amine (at  $80^\circ\text{C}$  for 24h without catalyst).

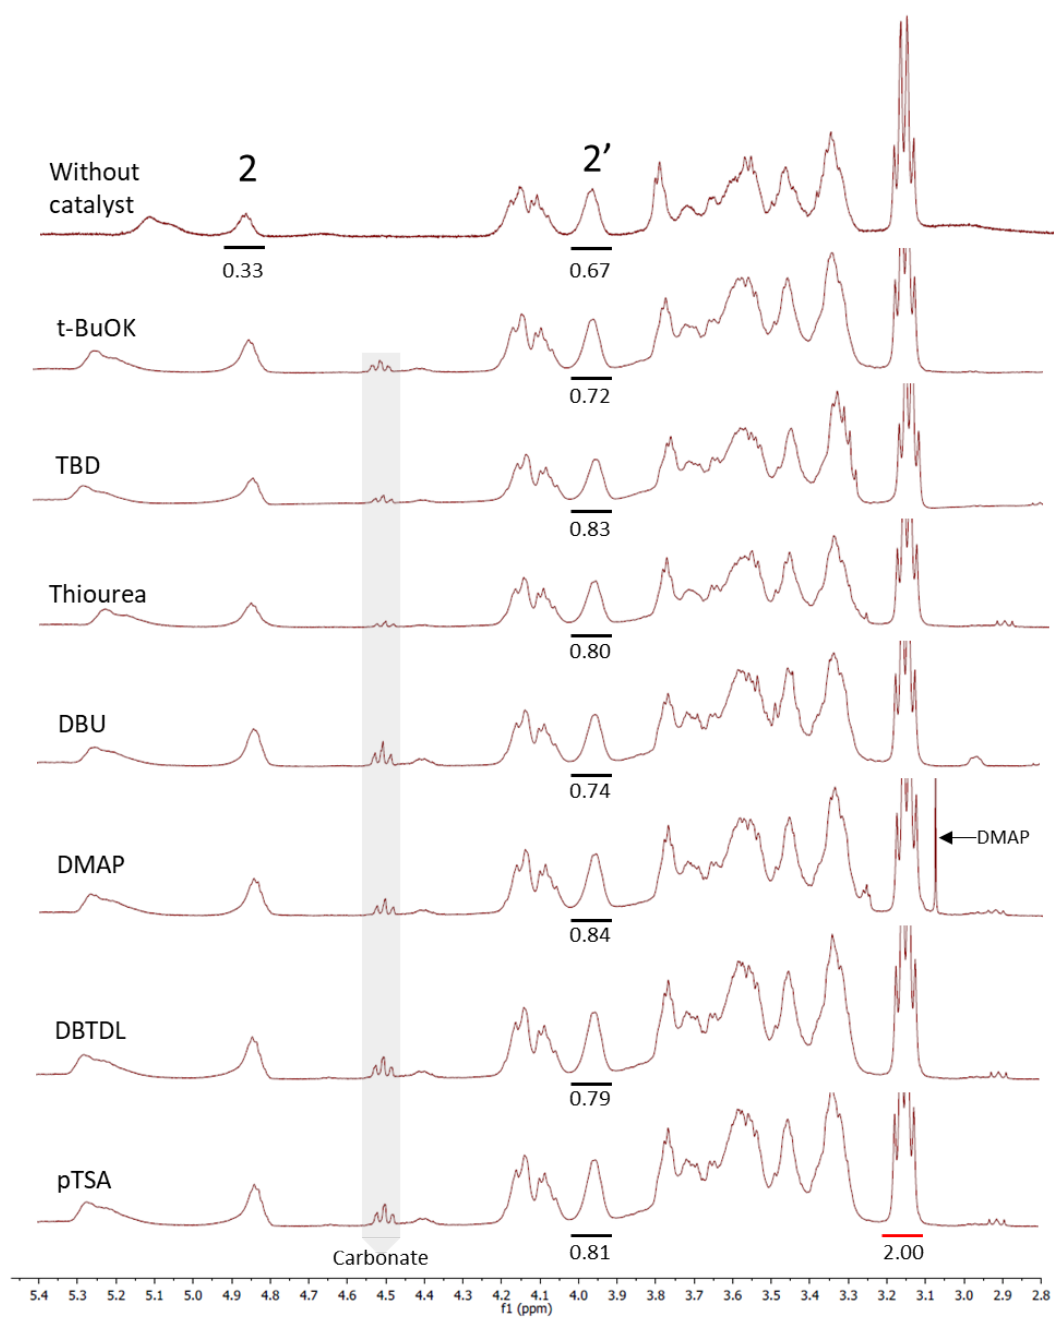

**Figure S13.**  $^1\text{H}$  NMR spectra (in  $\text{CDCl}_3$ ) of model reaction of trimethylolpropane tricarboxylate with 3 equivalents of *n*-butyl amine (at  $80^\circ\text{C}$  for 24h with different catalysts).

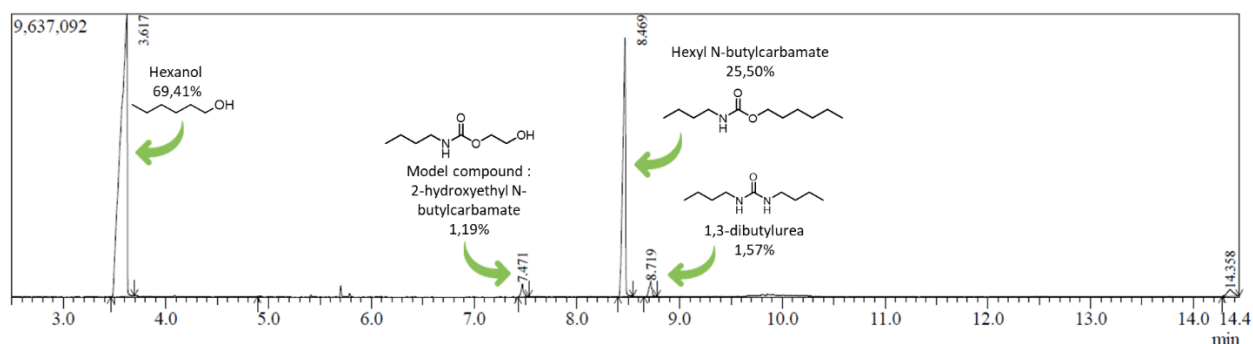

**Figure S14.** GC-MS chromatogram of the crude resulting from the reaction of 2-hydroxyethyl butylcarbamate and hexanol (5 equivalents) with *t*-BuOK (5 mol%) in bulk at 140°C for 72h.

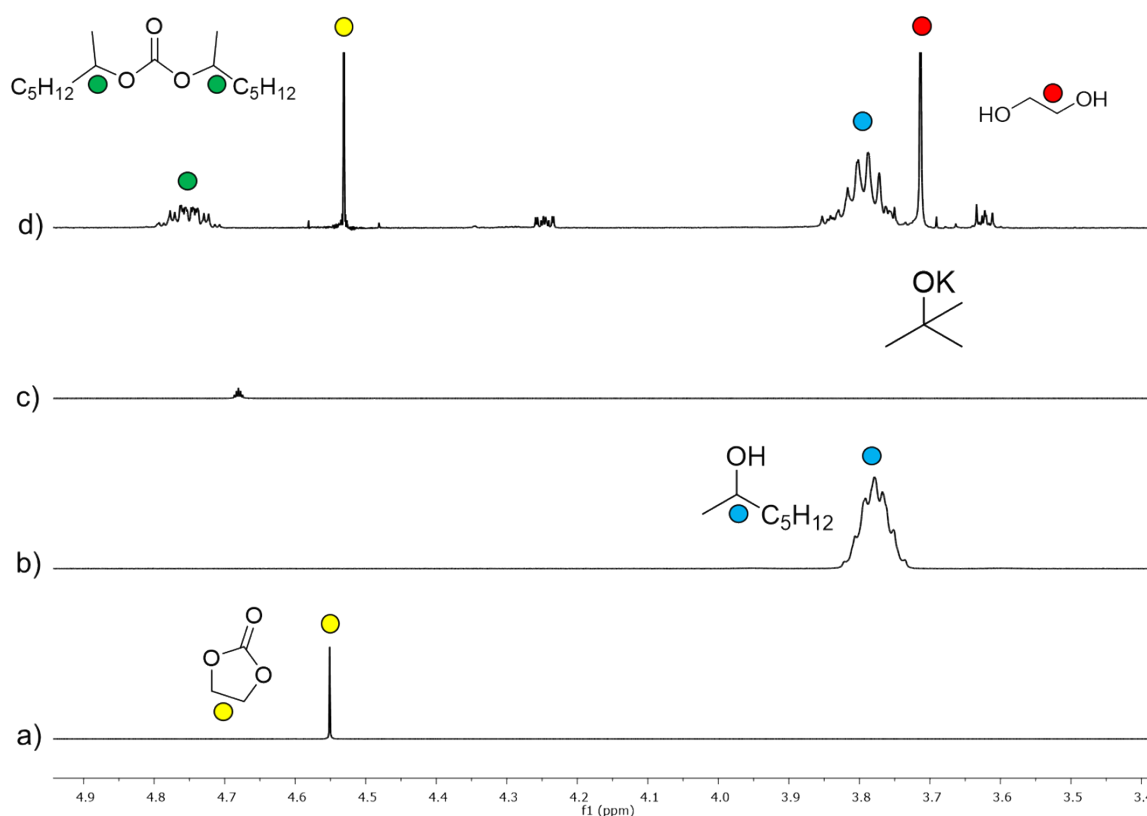

**Figure S15.** <sup>1</sup>H NMR spectra (in CDCl<sub>3</sub>) of a) ethylene carbonate, b) 2-heptanol, c) *t*-BuOK and d) model reaction of ethylene carbonate with 5 equivalents of 2-heptanol (at 140°C for 48h), the dicarbonate structure (green dots) is suggested to explain the formation of ethylene glycol during the reaction.

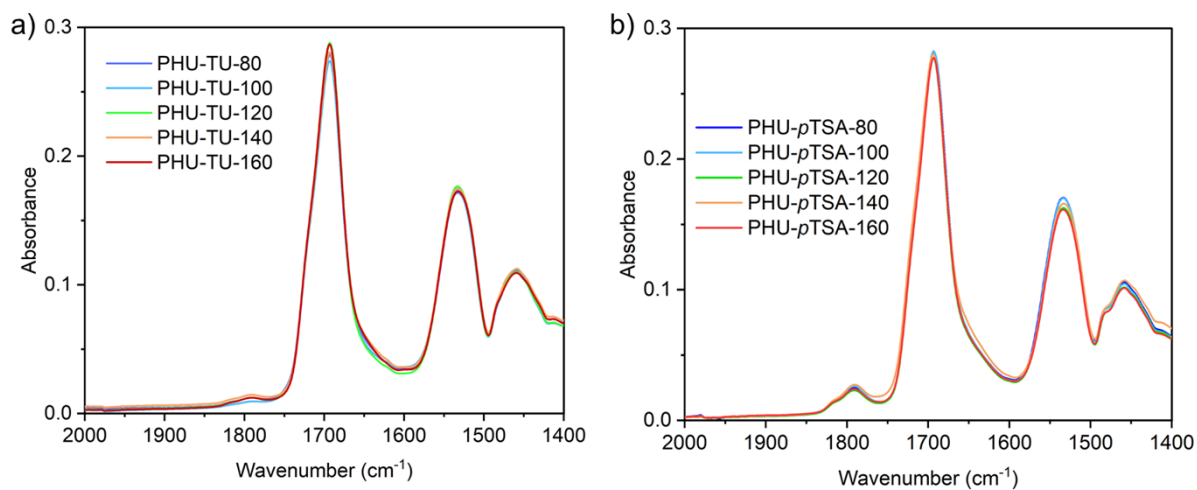

**Figure S16.** ATR-IR spectra (in absorbance) after frequency sweep experiments at 80°C, 100°C, 120°C, 140°C and 160°C of a) PHU-TU material and b) PHU-*p*TSA material. The spectra showed no significant evolution of ATR characteristic bands.
